# Supplementary material for: Analysis of Functions of VIP1 and Its Close Homologs in Osmosensory Responses of Arabidopsis thaliana
Source: PubMed Central journal article supplement (PMC4122391; doi:10.1371/journal.pone.0103930), 2014-08-05
Supplement: pone.0103930.s010.pdf [file pone.0103930.s010.pdf]

**Table S1.** cDNA clones obtained from RIKEN

| Gene name       | TAIR AGI code | RIKEN cDNA clone name |
|-----------------|---------------|-----------------------|
| <i>UBQ5</i>     | AT3G62250     | RAFL06-77-O18         |
| <i>VIP1</i>     | AT1G43700     | RAFL06-83-I17         |
| <i>AtbZIP52</i> | AT1G06850     | RAFL07-12-B18         |
| <i>PosF21</i>   | AT2G31370     | RAFL09-48-H24         |
| <i>AtbZIP69</i> | AT1G06070     | RAFL19-85-B03         |
| <i>AtbZIP29</i> | AT4G38900     | RAFL07-09-H03         |
| <i>AtbZIP30</i> | AT2G21230     | RAFL07-13-D16         |
| <i>AtbZIP18</i> | AT2G40620     | RAFL09-74-P11         |
