# Supplementary material for: Analysis of Functions of VIP1 and Its Close Homologs in Osmosensory Responses of Arabidopsis thaliana
Source: PubMed Central journal article supplement (PMC4122391; doi:10.1371/journal.pone.0103930), 2014-08-05
Supplement: pone.0103930.s012.pdf [file pone.0103930.s012.pdf]

**Table S3.** Primers used for semi-quantitative RT-PCR analyses of transgene expression

| Primer                      |    | Sequence (5' > 3')                    |
|-----------------------------|----|---------------------------------------|
| * <sup>1</sup> VIP1-GFP     | Fw | AGCGCTGCGGGATGAACTGA                  |
| PosF21-GFP                  | Fw | GGGCAAACAGGCAGTCCGCA                  |
| AtbZIP29-GFP                | Fw | CCGTCAATCCGCAGCACGGT                  |
| B in Fig. S9                | Fw | GTTCGTAGCTTCGCGGTTGATTCCGATTTCTTCGATG |
| C in Fig. S9                | Fw | CCCCACTAGTATGGAAGGAGGAGGAAGAGGACC     |
| D in Fig. S9                | Fw | CTCGTCGACATGGATAAAGCGGAATTAATTCCC     |
| * <sup>2</sup> E in Fig. S9 | Rv | GTAGGTGGCATCGCCCTCGC                  |

\*<sup>1</sup>This is the primer A in Fig. S9

\*<sup>2</sup>This primer is *GFP*-specific and was used for all the transgenes.
