# Supplementary material for: Analysis of Functions of VIP1 and Its Close Homologs in Osmosensory Responses of Arabidopsis thaliana
Source: PubMed Central journal article supplement (PMC4122391; doi:10.1371/journal.pone.0103930), 2014-08-05
Supplement: pone.0103930.s013.pdf [file pone.0103930.s013.pdf]

**Table S4.** Primer pairs used to generate constructs for Y1H and Y2H assays

| Gene             |    | Sequence (5' > 3') (restriction sites are underlined) | Vector and restriction site     |
|------------------|----|-------------------------------------------------------|---------------------------------|
| <i>VIP1</i>      | Fw | GCCAGTGAATTCATGGAAGGAGGAGGAAGAGG                      | pGADT7-Rec<br><i>EcoRI-XhoI</i> |
|                  | Rv | * <sup>1</sup> CCCCGTCGACAGCCTCTCTTGGTGAAATCC         | pGBKT7<br><i>EcoRI-SalI</i>     |
| <i>VIP1ΔN80</i>  | Fw | GAGGAATTCATGTCCGTTGATTCGGAAGA                         | pGBKT7                          |
|                  | Rv | * <sup>1</sup> CCCCGTCGACAGCCTCTCTTGGTGAAATCC         | <i>EcoRI-SalI</i>               |
| <i>VIP1ΔN164</i> | Fw | GGTGAATTCGATTCTAGCTTCTGTGAGTGG                        | pGBKT7                          |
|                  | Rv | * <sup>1</sup> CCCCGTCGACAGCCTCTCTTGGTGAAATCC         | <i>EcoRI-SalI</i>               |
| <i>AtbZIP52</i>  | Fw | CTCCATATGGAGAAATCAGATCCTCC                            | pGADT7-Rec<br><i>NdeI-SacI</i>  |
|                  | Rv | * <sup>2</sup> GGAAACAGCTATGACCATGATTAC               | pGBKT7<br><i>NdeI-SalI</i>      |
| <i>AtbZIP69</i>  | Fw | CTCCATATGGATAAGGAGAAATCTCCTGC                         | pGADT7-Rec<br><i>NdeI-BamHI</i> |
|                  | Rv | * <sup>2</sup> GGAAACAGCTATGACCATGATTAC               | pGBKT7<br><i>NdeI-BamHI</i>     |
| <i>PosF21</i>    | Fw | CCACCCATGGATAAGGAGAAATCTCCAGC                         | pGADT7-Rec<br><i>NcoI-XbaI</i>  |
|                  | Rv | GGGACTAGTGTCTCTTTCTGGGCTTGTG                          | pGBKT7<br><i>NcoI-SalI</i>      |
| <i>AtbZIP29</i>  | Fw | CCTCATATGGGTGATACAGAGAAGTGT                           | pGADT7-Rec<br><i>NdeI-BamHI</i> |
|                  | Rv | * <sup>2</sup> GGAAACAGCTATGACCATGATTAC               | pGBKT7<br><i>NdeI-BamHI</i>     |
| <i>AtbZIP30</i>  | Fw | CTCCATATGGGTGGTGGTGGTGATAC                            | pGADT7-Rec<br><i>NdeI-BamHI</i> |
|                  | Rv | * <sup>2</sup> GGAAACAGCTATGACCATGATTAC               | pGBKT7<br><i>NdeI-BamHI</i>     |

\*<sup>1</sup>These are identical and specific to the 3' end of *VIP1* ORF.

\*<sup>2</sup>These are identical and specific to the sequence of the vector for RIKEN cDNA clones. These clones have either a *BamHI* or a *SacI* site at the 3'-flanking region of cDNA sequences. The ORF of *AtbZIP52* were amplified by PCR using the RIKEN cDNA clone as template and the listed primers, and inserted into the *NdeI-SacI* site of pGADT7-Rec. This construct was digested by *NdeI* and *XhoI*, and the resultant DNA fragment containing *AtbZIP52* ORF was inserted into the *NdeI-SalI* site of pGBKT7. The ORFs of *AtbZIP69*, *AtbZIP29* and *AtbZIP30* were obtained by PCR using the RIKEN cDNA clones as template and listed primers, digested by *NdeI* and *BamHI*, and inserted into the *NdeI-BamHI* site of pGADT7-Rec and pGBKT7.
